# Supplementary material for: Fabrication of 3-nm-thick Si3N4 membranes for solid-state nanopores using the poly-Si sacrificial layer process
Source: PubMed Central journal article supplement (PMC4589763; doi:10.1038/srep14656), 2015-10-01
Supplement: srep14656-s1.pdf [file srep14656-s1.pdf]

**Supplementary Information for  
Fabrication of 3-nm-thick Si<sub>3</sub>N<sub>4</sub> membranes for solid-state  
nanopores using the poly-Si sacrificial layer process**

Itaru Yanagi\*, Takeshi Ishida, Koji Fujisaki and Ken-ichi Takeda

Hitachi Ltd., Central Research Laboratory, 1-280 Higashi-Koigakubo, Kokubunji, Tokyo, 185-8603

The Supplementary Information includes:

SI-1. *I-V* characteristics of Si<sub>3</sub>N<sub>4</sub> opening windows

SI-2. *I-V* characteristics of nanopores

SI-3. Noise spectrums in measurements of the ionic current through nanopores

SI-4. TEM images of nanopores before and after ionic-current measurements

SI-5. Ionic-current blockades with several nanopores at 0.1 V

### SI-1. *I-V* characteristics of Si<sub>3</sub>N<sub>4</sub> opening windows

To measure the *I-V* characteristics of the opening window in the top Si<sub>3</sub>N<sub>4</sub> layer, the bottom Si<sub>3</sub>N<sub>4</sub> membrane was removed with hydrofluoric acid (HF:water = 1:100 for 10 min). The etching rate of Si<sub>3</sub>N<sub>4</sub> was 0.2 - 0.3 nm/min. Therefore, the top Si<sub>3</sub>N<sub>4</sub> layer was also slightly etched by 4-6 nm. As a result, the thickness of the top Si<sub>3</sub>N<sub>4</sub> layer decreased from 100 nm to 94-96 nm (Fig. S-1a). Fig. S-1b shows the *I-V* characteristics of the top Si<sub>3</sub>N<sub>4</sub> opening window obtained using 1M KCl. Six different chips were measured. The conductance of the Si<sub>3</sub>N<sub>4</sub> opening windows was 770 – 930 nS.

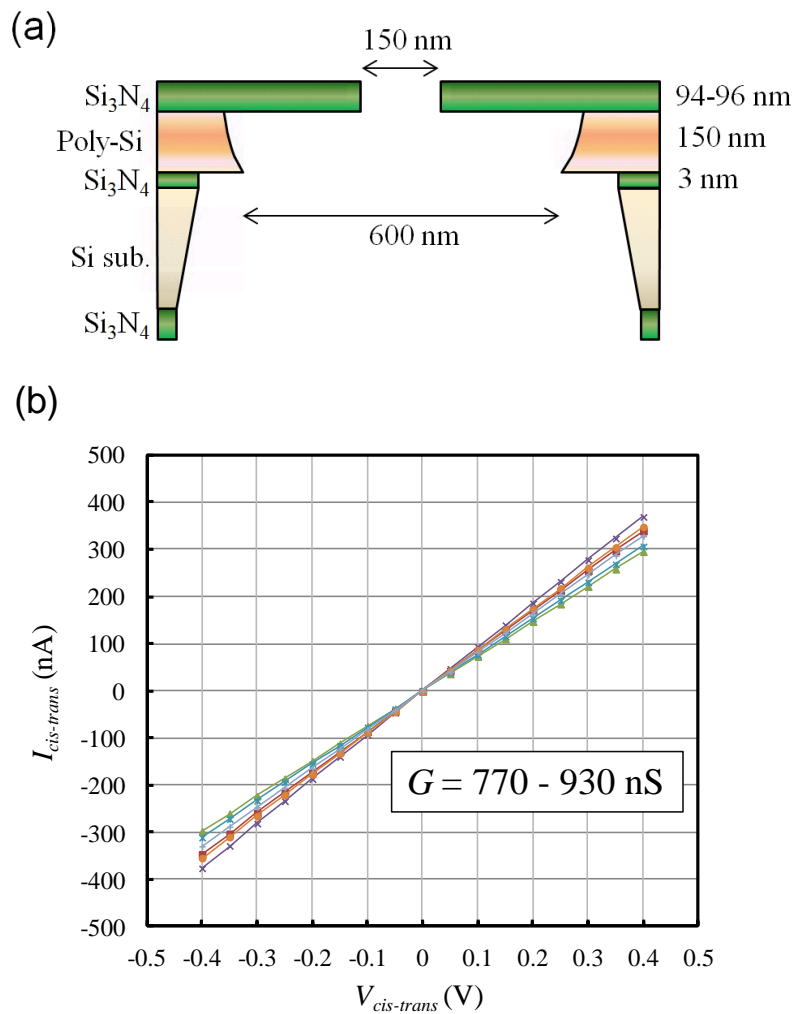

Fig. S-1

## SI-2. *I-V* characteristics of nanopores

Fig. S-2a and Fig. S-2b show the *I-V* characteristics of 8 different nanopores in 1 M KCl. Fig. S-2b is a magnified view of Fig. S-2a with a voltage range of -0.1 to 0.1 V. The current was recorded 3 to 5 seconds after the voltage was applied.

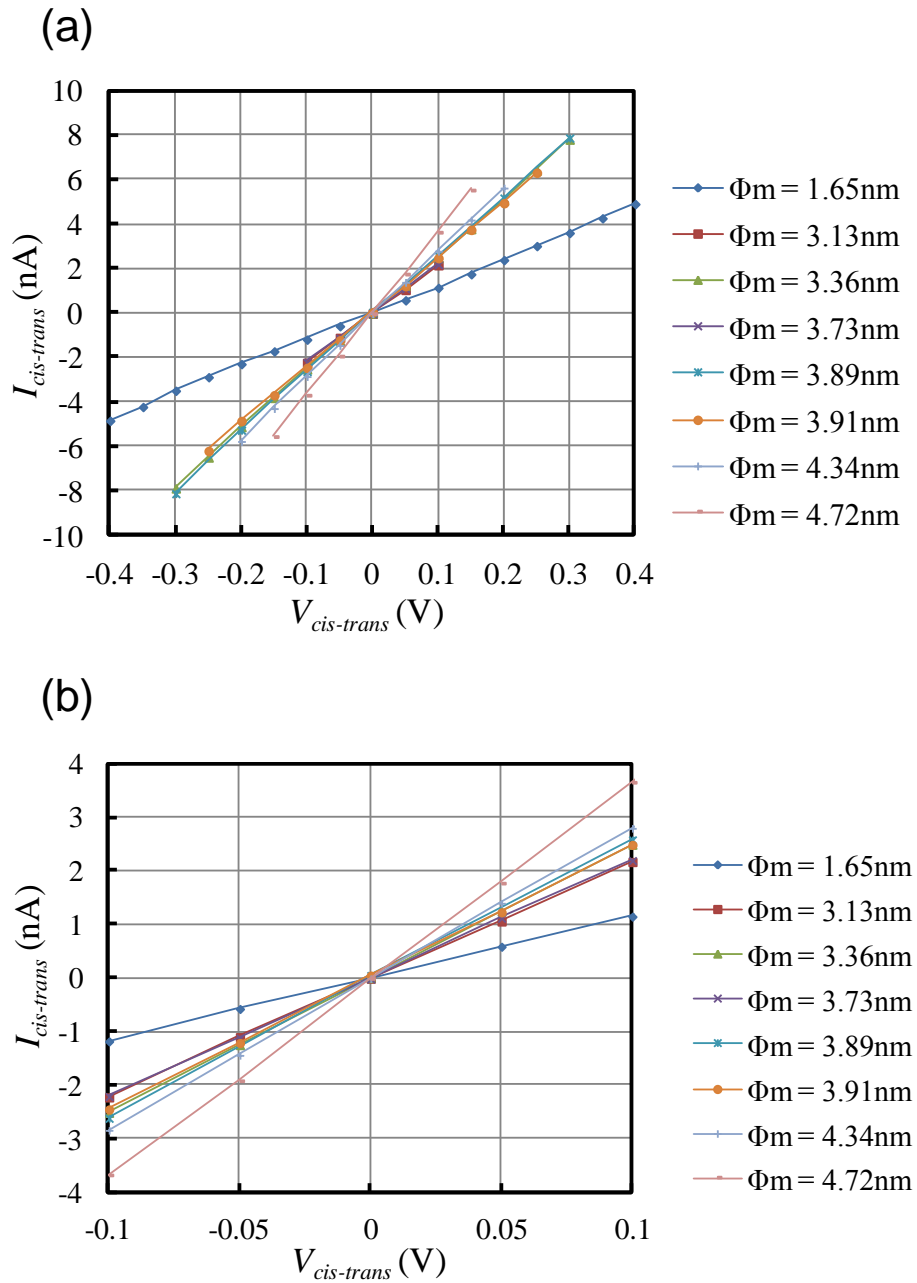

Fig. S-2

### SI-3. Noise spectrums in measurements of the ionic current through nanopores

Noise spectrums of 3 different nanopores are shown in Fig. S-3. The ionic current was measured at 0.1 V in 1 M KCl. The detected current was low-pass-filtered with a cut-off frequency of 10 kHz.

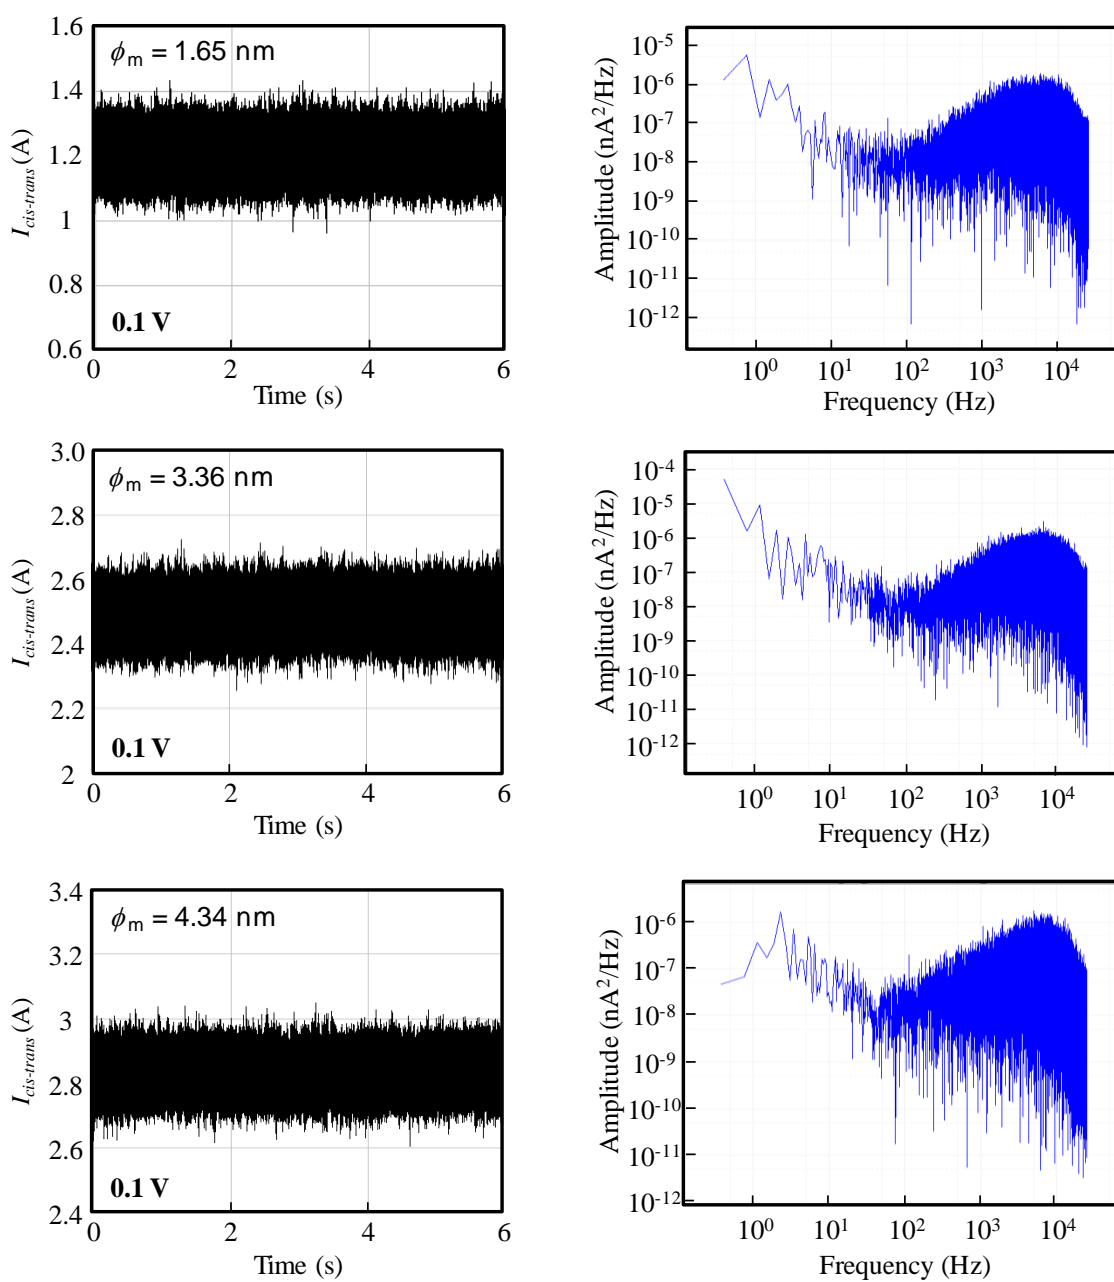

Fig. S-3

### SI-4. TEM images of nanopores before and after ionic-current measurements

TEM images of 2 nanopores before and after long-term continuous measurement of the ionic current. The applied voltage was 0.1 V except for the initial short  $I$ - $V$  measurements. The TEM images confirm that the nanopores widened after the ionic-current measurement.

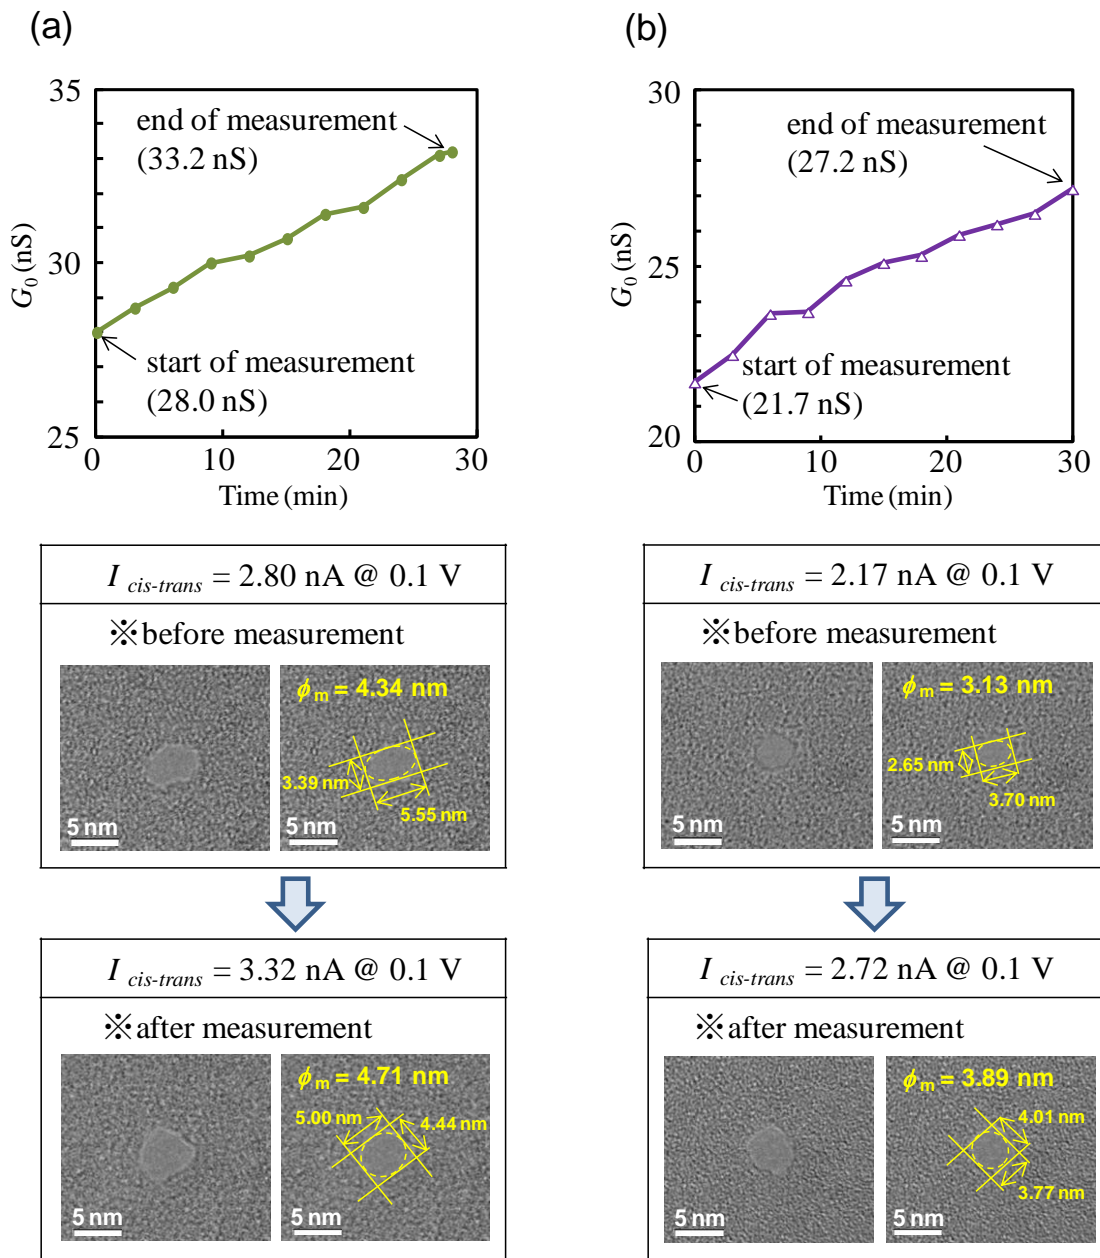

Fig. S-4

### SI-5. Ionic-current blockades for several nanopores at 0.1 V

Ionic-current blockades ( $\Delta I$ ) measured from 4 different nanopores at 0.1 V are shown in Fig. S-5.  $\Delta I_p$  shows variation (0.33 to 0.70 nA) between different nanopore chips. According to a report by Carlsen *et al.* [1], this variation may be attributed to variations in the amount of counterions surrounding the dsDNA.

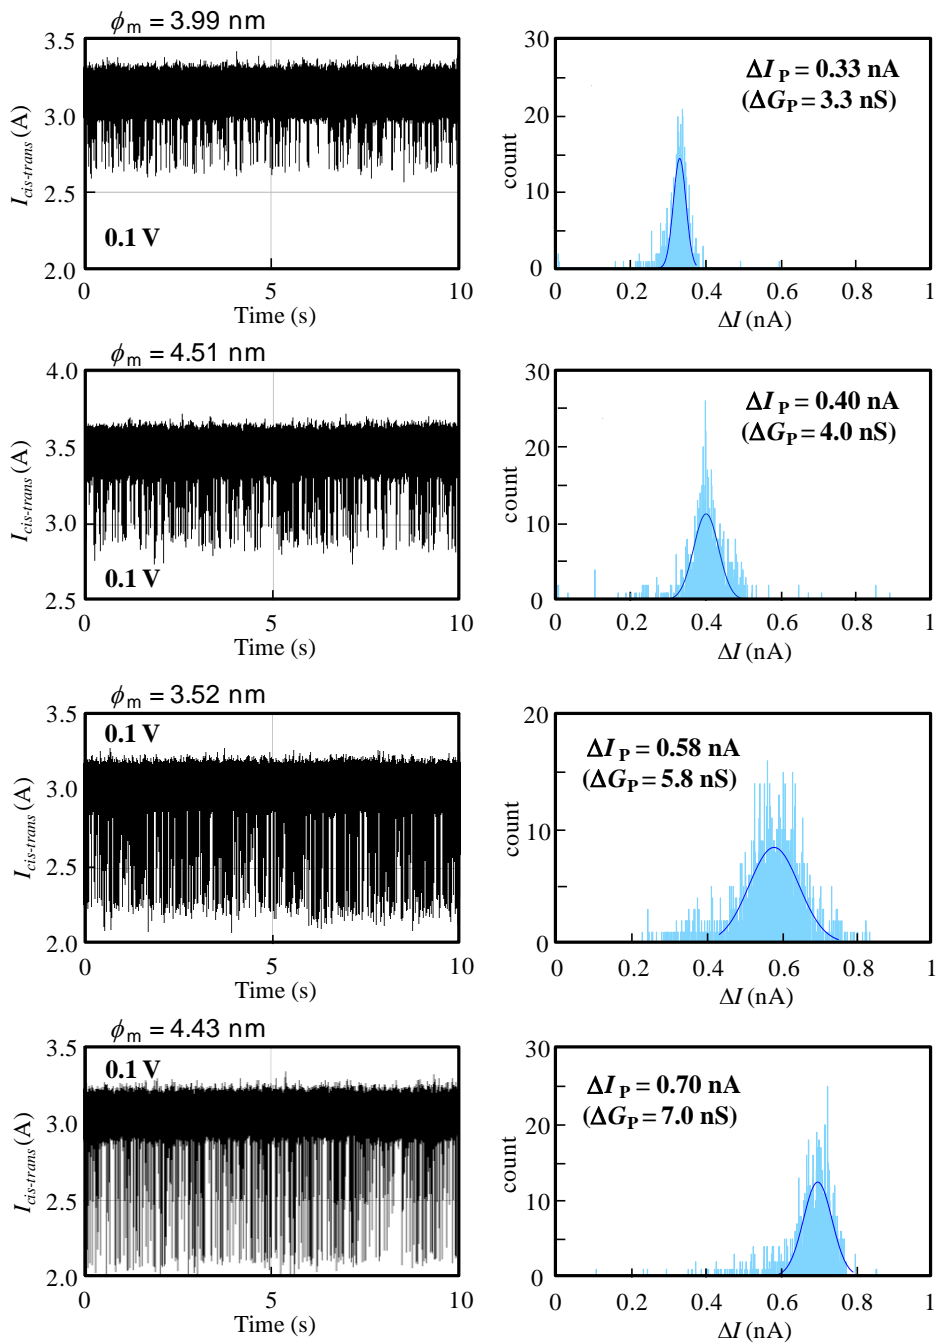

Fig. S-5

## References

- [1] Carlsen, A. T., Zahid, O. K., Ruzicka, J., Taylor, E. W., and Hall, A. R. Interpreting the Conductance Blockades of DNA Translocations through Solid-State Nanopores. *ACS Nano*, **8**, 4754–4760 (2014)
